# Supplementary material
Source: MDPI journal article supplement (https://www.mdpi.com/2079-6412/7/7/96)
Supplement: s1 [file s1]

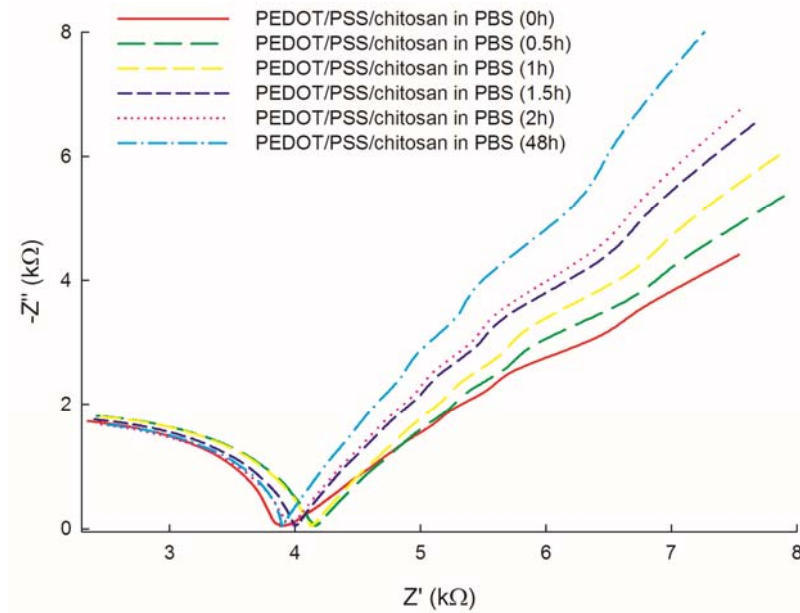

**Figure S1.** A typical electrochemical impedance spectroscopy (EIS) in the form of a Nyquist plot of the Poly(3,4-ethylenedioxythiophene)/poly(styrene sulfonate)/chitosan (PEDOT/PSS/chitosan)-coated electrodes in phosphate-buffered saline (PBS) at different time points of 0, 0.5, 1, 1.5, 2 and 48 h.

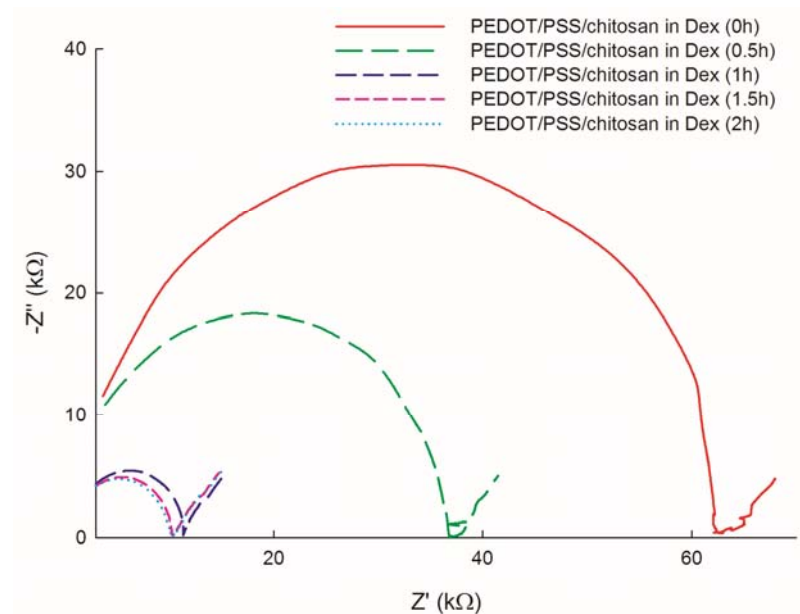

**Figure S2.** A typical EIS in the form of Nyquist plot of the PEDOT/PSS/chitosan-coated electrodes, with the polymerization time of 1800, 3600 and 5400 s, in 10  $\mu$ M Dex solution at different time points of 0, 0.5, 1, 1.5 and 2 h, respectively.

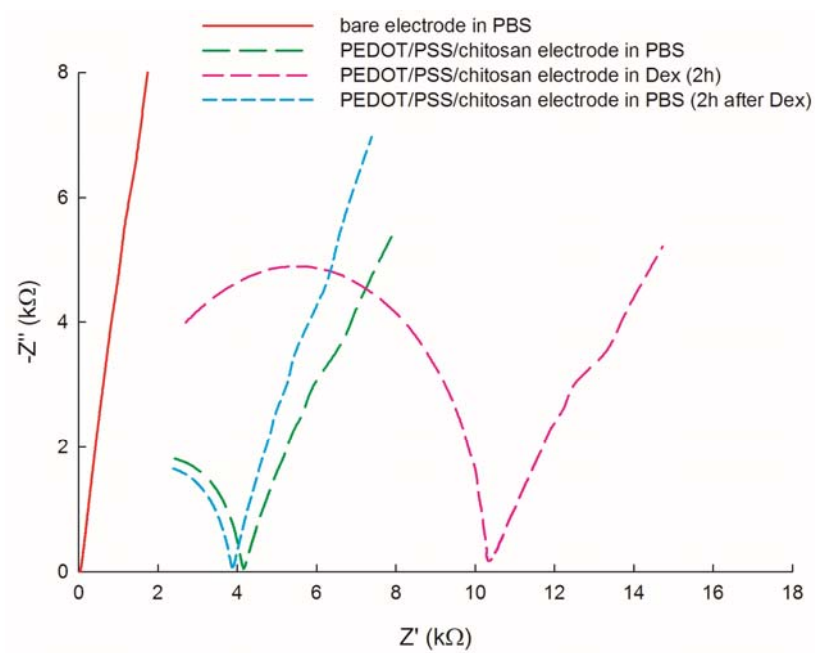

**Figure S3.** Typical EIS in the form of Nyquist plot of the bare Pt electrode in PBS, the PEDOT/PSS/chitosan-coated electrodes in PBS, in 10  $\mu$ M Dex for 2 h, and in PBS 2 h after in Dex, respectively.
